# Supplementary material for: Climate Policy Reduces Racial Disparities in Air Pollution from Transportation and Power Generation
Source: PubMed Central journal article supplement (PMC11636253; doi:10.1021/acs.est.4c03719), 2024-11-26
Supplement: es4c03719_si_001.pdf [file es4c03719_si_001.pdf]

1 Supplemental Information

2  
3 Title: Climate Policy Reduces Racial Disparities in Air Pollution from Transportation and Power  
4 Generation

5  
6 Authors: Katherine H Jordan<sup>1\*</sup>; Luke R Dennin<sup>1</sup>; Peter J Adams<sup>1,2</sup>; Paulina Jaramillo<sup>1</sup>; &  
7 Nicholas Z Muller<sup>1,3,4</sup>.

8  
9 Affiliations: <sup>1</sup>Engineering and Public Policy, Carnegie Mellon University, 5000 Forbes Ave,  
10 Pittsburgh, PA, 15213, USA.; <sup>2</sup>Civil and Environmental Engineering, Carnegie Mellon  
11 University, 5000 Forbes Ave, Pittsburgh, PA, 15213, USA; <sup>3</sup>Tepper School of Business,  
12 Carnegie Mellon University, 5000 Forbes Ave, Pittsburgh, PA, 15213, USA; <sup>4</sup> National Bureau  
13 of Economic Research, 1050 Massachusetts Avenue, Cambridge, MA, 02138.

14  
15 \*Corresponding Author contact: khjordan@andrew.cmu.edu

16  
17 Pages: 20  
18 Figures: 7  
19 Tables: 5

20  
21  
22  
23  
24  
25  
26  
27  
28  
29  
30  
31  
32  
33  
34  
35  
36  
37  
38  
39  
40  
41  
42  
43  
44  
45  
46

1  
2  
3

# I. Supplemental Figures

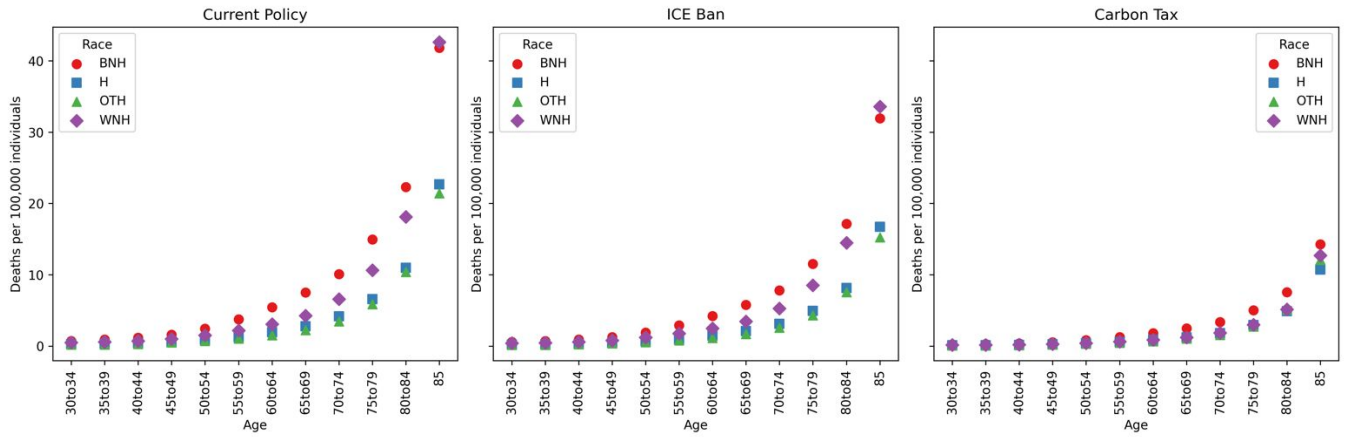

4  
5 *Figure S.1: Age- and race-specific deaths per 100,000 individuals for three select scenarios.*

6

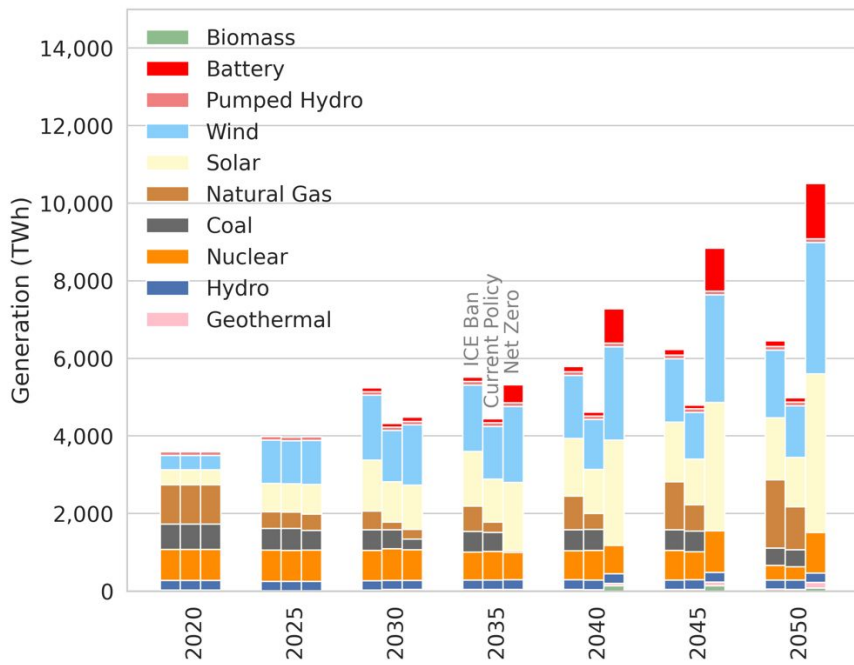

7  
8 *Figure S.2: Electricity generation by source under the ICE Ban, Current Policy, and Net Zero*  
9 *scenarios*

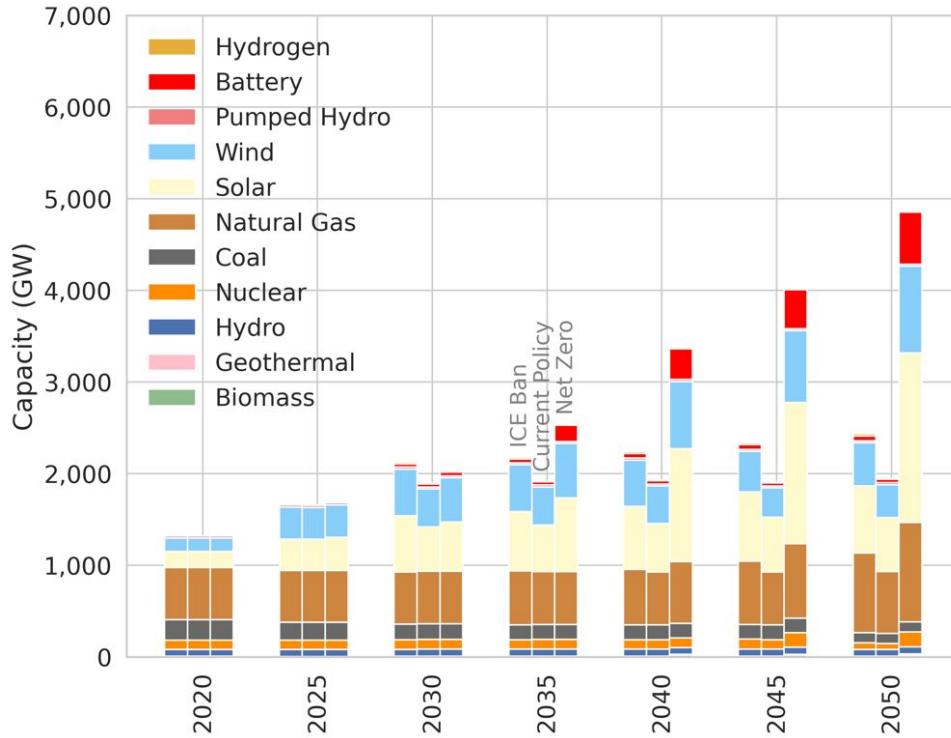

1  
2 *Figure S.3: Electric capacity by source under the ICE Ban, Current Policy, and Net Zero*  
3 *scenarios*

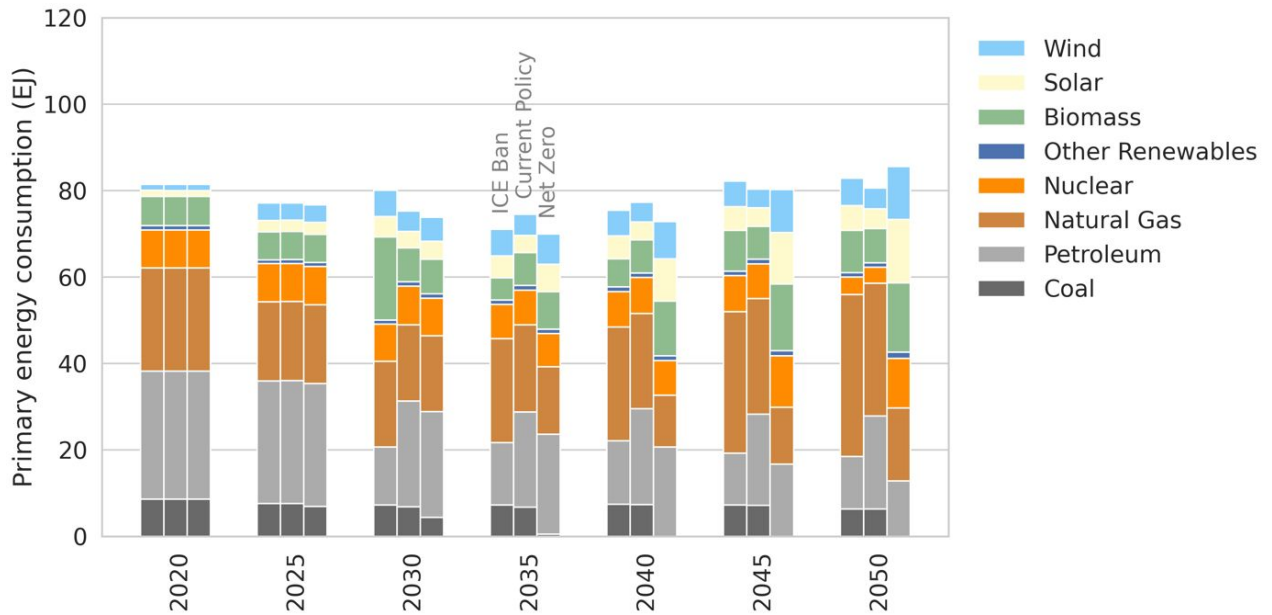

4  
5 *Figure S.4: Final energy consumption by source under the ICE Ban, Current Policy, and Net-*  
6 *Zero scenarios.*

7  
8  
9

## 1           **II.       Details on EGU Downscaling**

2           To determine the location of future capacity, we implement a grow-in-place heuristic. We  
3 use data on planned EGUs and EGUs that have retired since 2002 from December 2021’s Form  
4 EIA-860M ‘Monthly Update to Annual Electric Generator Report’ to map existing and planned  
5 facilities to Temoa’s capacity <sup>1</sup>. We use this dataset's geographical data, energy source code, and  
6 the nameplate capacity (MW) of plants. We then pull new fossil capacity (MW) from Temoa by  
7 fuel and cluster. To estimate the new capacity’s location, we pull all planned EGUs in the  
8 cluster’s region from Form EIA-860M, irrespective of plant type (combined cycle, combustion  
9 turbine, etc.). If the sum of the planned capacity in that region is greater than the new cluster’s  
10 capacity from Temoa, we choose a random group of the planned plants whose capacities sum to  
11 between 0.75x and 1.25x the capacity required by the Temoa cluster. We assume the new  
12 capacity is built at the same sites as this list of planned sites. If planned capacity is insufficient,  
13 we repeat the process, adding in retired capacity from the region. If the sum of the planned and  
14 retired capacity in the region is less than the new cluster’s capacity, we assign all of the planned  
15 and retired plants in that region to the new cluster. This implicitly assumes that some of the new  
16 plants will have a higher capacity than planned (if the plant is planned) or than it had when  
17 operating (if the plant is retired). We do not have data on average annual generation for the  
18 retired or planned plants, so we assume that generation scales with capacity in each cluster. That  
19 is, if a plant’s capacity is equal to 5% of the cluster’s total capacity, we assume the new plant  
20 generates 5% of the total electricity generated in that cluster.

## 21           **III.       Downscaling Algorithm Evaluation**

22           Models with a multi-decadal time horizon cannot be validated <sup>2</sup>. However, to better  
23 understand the uncertainty present within the downscaling framework, we compare modeled  
24 county-level emissions from the transportation and electric sectors to existing data on emissions.  
25 This exercise should not be viewed as a direct comparison, but rather as a sanity check on the  
26 downscaling method. Temoa’s first time period spans from 2020 to 2024. Even under the  
27 Current Policy scenario, Temoa simulates a changing energy landscape. For example, in 2022,  
28 US coal-fired powerplants generated 828 TWh of electricity <sup>3</sup>. Temoa simulates 654 TWh of  
29 coal-fired electricity generation in the first time period. These differences are unsurprising since  
30 Temoa assumes a unitary decision-maker and does not account for behavioral and market  
31 dynamics that occur in the real world.

32           In this exercise, we compare county-level NO<sub>x</sub> emissions in the electric and transportation  
33 sectors from Temoa to the EPA’s National Emissions Inventory (NEI) <sup>4</sup>. The EPA publishes the  
34 NEI approximately every three years. The most recent data comes from 2020, but due to effects  
35 from COVID-19, 2020 is likely not a representative year. As a result, we compare modeled  
36 downscaled emissions to both the 2020 and 2017 NEI. In the electricity sector, we also compare  
37 our results to the EPA’s Emissions & Generation Resource Integrated Database (eGRID) <sup>5</sup>. We  
38 compare our results and NEI results to the most recent eGRID release, which contains data from  
39 2021.  
40

1 Figure S.4 compares Temoa’s simulated on-road transportation emissions to the NEI in 2017  
 2 and 2020, showing the absolute difference between the two datasets. We compare NEI results  
 3 aggregated to the county-level to our downscaled simulation. In the figures, a positive value  
 4 indicates that Temoa projected higher emissions than the NEI reported. We expected Temoa’s  
 5 emissions projections to be lower than the 2017 projections due to increased vehicle  
 6 electrification and improvements to vehicle efficiency. We anticipated that NEI 2020 emissions  
 7 may be lower than Temoa’s simulated emissions due to effects from COVID-19. Figure S.4  
 8 shows strong agreement between the NEI and Temoa, with the distribution shifting slightly  
 9 between the two NEI data years, in line with our hypotheses.  
 10

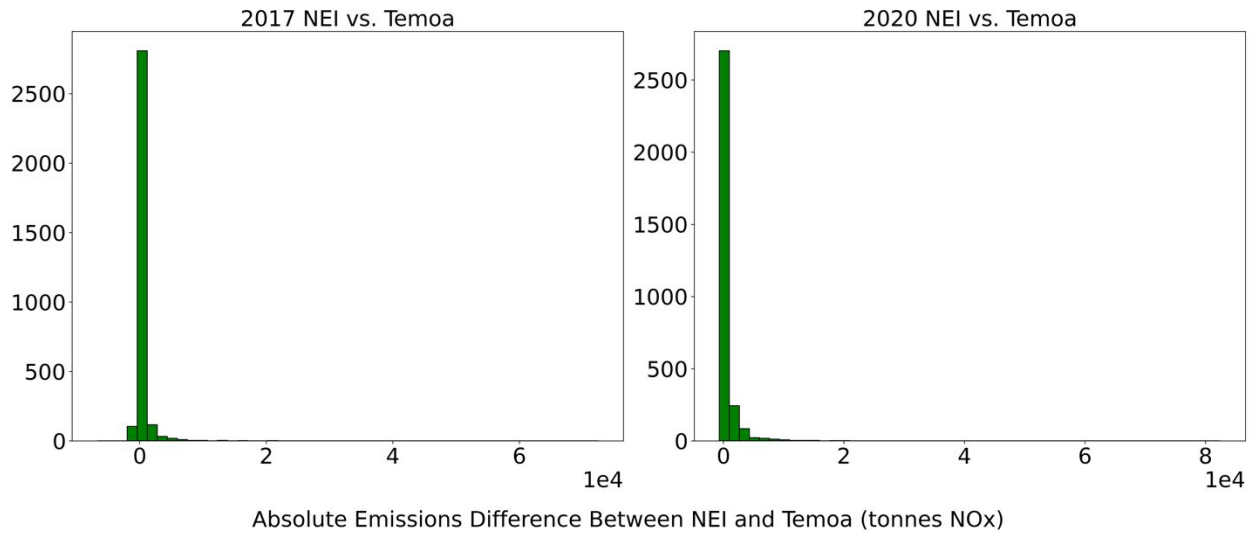

11 Absolute Emissions Difference Between NEI and Temoa (tonnes NO<sub>x</sub>)  
 12 *Figure S.5: Difference between NO<sub>x</sub> emissions reported by the National Emissions Inventory*  
 13 *and emissions simulated by Temoa and downscaled to US counties. Emissions reported in metric*  
 14 *tons. Left: 2017 NEI vs. Temoa. Right: 2020 NEI vs. Temoa.*

15 Both histograms are centered near zero, indicating broad alignment with the NEI. The  
 16 most significant outliers represent counties including Los Angeles and Maricopa counties, where  
 17 total emissions are high, so a small percent difference appears large in absolute magnitude.

18 Next, we compare simulated NO<sub>x</sub> emissions from electric power generation to reported  
 19 emissions from the NEI and eGRID. The NEI and eGRID datasets required some data filtration.  
 20 To select only EGUs from the NEI data, we filtered the column ‘naics\_description’ to include  
 21 only sources described as ‘Fossil Fuel Electric Power Generation’ or ‘Electric Power  
 22 Generation.’ We also specified that ‘facility\_source\_type’ must be ‘Electricity Generation via  
 23 Combustion.’ For the eGRID data, while all sources are powerplants, we filtered ‘Plant primary  
 24 fuel category’ to include only ‘GAS’ and ‘COAL.’

25 We began by comparing the 2017 and 2020 NEI datasets to 2020 and 2021 eGRID to  
 26 understand both interannual variability and variability between data sources (Figure S.4). This  
 27 inter-dataset comparison reveals two trends. First, in counties where both datasets report  
 28 emissions, there is general agreement across datasets and time periods. Second, there are many  
 29 counties where either eGRID or NEI reports positive emissions, but not both. Figure S.5  
 30 illustrates this trend, showing the distribution of the percent difference between the different  
 31 datasets. In order to avoid positive or negative infinities, we replace all 0 values with 1E-4. This

1 leads to large outliers, all of which are displayed in the figure. The top row of Figure S.4 shows  
2 the raw data and the bottom row shows a zoomed in version to highlight outliers.  
3

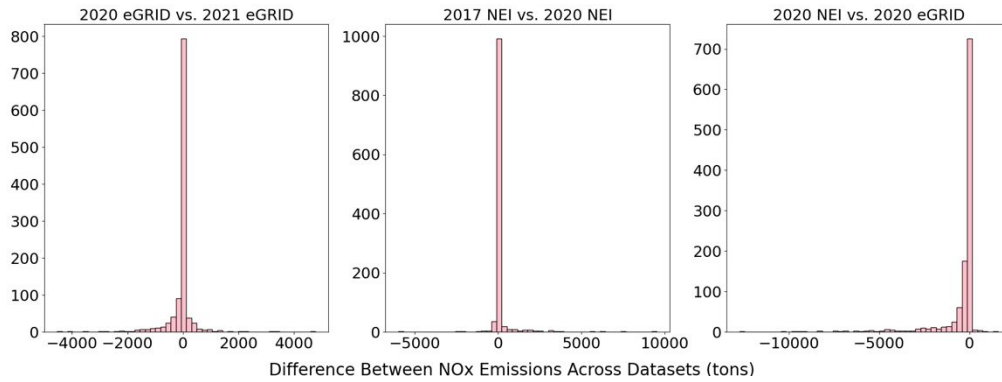

4  
5 *Figure S.6: Absolute emissions comparison between eGRID and the National Emissions*  
6 *Inventory [kt].*  
7

8 When both Temoa and NEI or eGRID report emissions, there is largely agreement, but there are  
9 many counties where one source (Temoa, NEI, eGRID) reports emissions and at least one other  
10 does not. The downscaled emissions from Temoa align most closely with the NEI, demonstrated  
11 in Figure S.6  
12  
13  
14  
15  
16  
17  
18  
19  
20  
21  
22  
23  
24  
25  
26

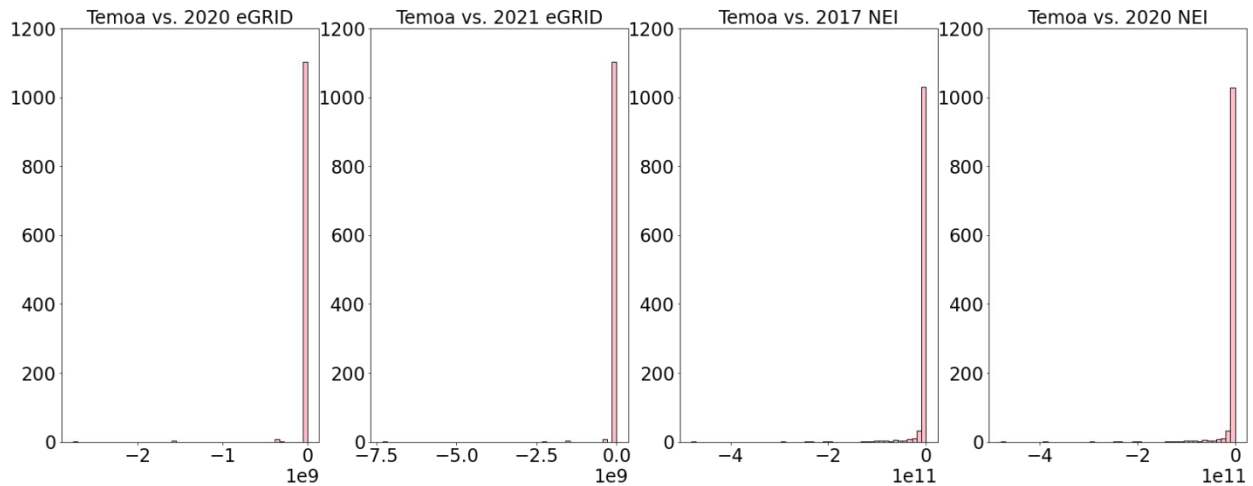

Percent Difference Between NO<sub>x</sub> Emissions: Temoa vs. eGRID and NEI Datasets

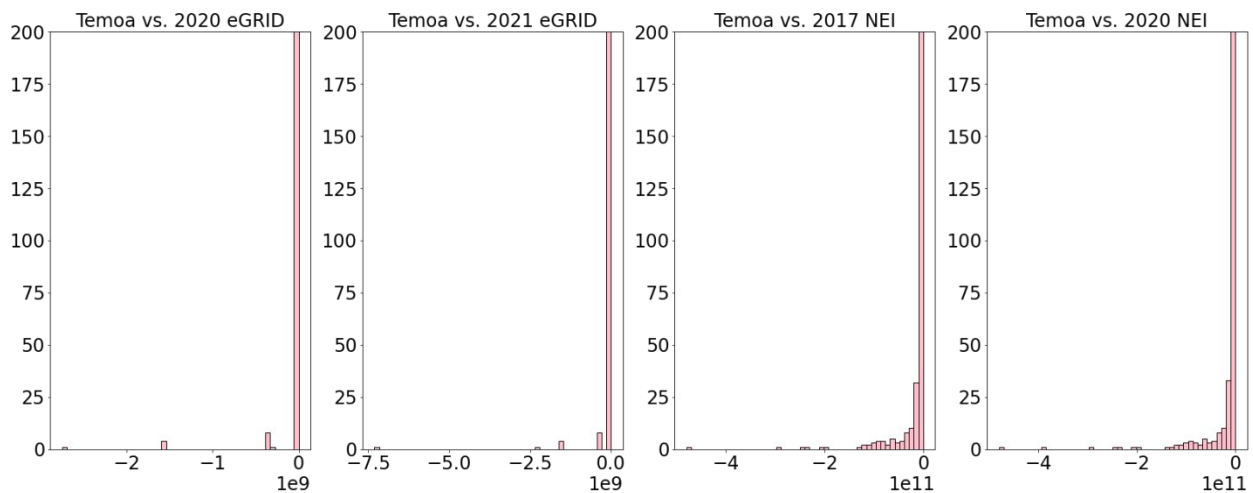

Percent Difference Between NO<sub>x</sub> Emissions: Temoa vs. eGRID and NEI Datasets (zoomed in)

Figure S.7: Percent difference between NO<sub>x</sub> emissions from power generation simulated by Temoa and reported by existing data source. Columns: (1) Temoa vs. 2020 eGRID (2) Temoa vs. 2021 eGRID (3) Temoa vs. 2017 NEI (4) Temoa vs. 2020 NEI. Rows: (1) Raw data (2) Zoomed in to more clearly display outliers.

#### IV. Air Quality Modeling

We use select modules of the AP3 integrated assessment model to connect emissions to PM<sub>2.5</sub> exposure and mortality risk for three criteria air pollutants: primary PM<sub>2.5</sub>, SO<sub>2</sub>, and NO<sub>x</sub>. We summarize AP3 herein; however, more details can be found in Dennin & Muller (2024)'s supplementary information<sup>6</sup> as well as in Clay et al. (2019)<sup>7</sup> and Tschofen et al. (2019)<sup>8</sup>. AP3<sup>9</sup> is the third iteration of the Air Pollution Emissions Experiments and Policy analysis (APEEP) model<sup>10,11</sup>. AP3 uses all emissions of primary PM<sub>2.5</sub>, SO<sub>2</sub>, and NO<sub>x</sub> and also NH<sub>3</sub> and VOCs, provided by the EPA's NEI, to estimate baseline concentrations of ambient PM<sub>2.5</sub> in every county in the contiguous US<sup>12</sup>. We use the 2017 NEI to compute a baseline against which we assess the PM<sub>2.5</sub> concentrations from marginal emissions (i.e., one additional short ton). This baseline accounts for ambient PM<sub>2.5</sub> levels resulting from nationwide emissions, including directly emitted PM<sub>2.5</sub>, organic aerosols from VOCs, ammonium sulfate ((NH<sub>4</sub>)<sub>2</sub>SO<sub>4</sub>) from NH<sub>3</sub> and SO<sub>2</sub>, sulfate (SO<sub>4</sub><sup>2-</sup>) from SO<sub>2</sub>, and ammonium nitrate (NH<sub>4</sub>NO<sub>3</sub>) from NH<sub>3</sub> and NO<sub>x</sub>. The

1 formation of each subspecies of PM<sub>2.5</sub> is dependent on the unique atmospheric dispersion and  
2 chemistry processes associated with the release of its source criteria air pollutant.

3 AP3 models ground-level sources differently than point sources. Moreover, the model treats  
4 point sources differently, a function of their effective heights (physical stack height plus the  
5 plume rise of released emissions)<sup>13</sup>. Effective heights are calculated following Turner (1994)<sup>13</sup>.  
6 Stack and discharge parameters are obtained from the Sparse Matrix Operator Kernel Emissions  
7 (SMOKE) flat files, provided by the Environmental Protection Agency (EPA)<sup>14</sup>. Weather  
8 parameters come from reanalysis data provided by the National Centers for Environmental  
9 Prediction (NCEP), with data sourced from the Physical Sciences Laboratory of the National  
10 Oceanic and Atmospheric Administration (NOAA)<sup>15</sup>. We compute the annual average of  
11 surface-level temperatures and horizontal wind speeds using daily average data, spatially  
12 resolved in a 2.5-degree latitude by 2.5-degree longitude grid. Each county is assigned the  
13 weather data from the grid cell in which it is located. If a county spans multiple grid cells, the  
14 data are averaged based on the area of each cell. Our methodology assumes stable conditions, an  
15 average lapse rate of -0.0065 K/m, and considers that, for each facility, the dominant rise  
16 mechanism is the one producing the greater rise between buoyant and momentum effects.

17 AP3 models three bins for point sources: low, medium, and tall<sup>11</sup>. For low and medium,  
18 emissions are modeled as being released from the population-weighted centroid of the county in  
19 which they are released. (Ground-level emissions are also assumed to be released at the counties'  
20 population-weighted centroids.):

- 21
- 22 • The low bin contains facilities with effective heights of less than 250 meters.
- 23 • The medium bin is designed for facilities with effective heights greater than 250
- 24 meters and less than 500 meters.
- 25 • When the APEEP) model was first developed<sup>10</sup>, facilities with effective heights
- 26 greater than 500 meters were uniquely modeled—making up the “tall stacks bin
- 27 inventory.”
- 28

29 The tall bin’s emissions are modeled from the coordinates of the facility and the effective heights  
30 of its stacks. However, any new facility with an effective height greater than 500 meters is not  
31 modeled in the tall bin but is instead placed in the medium bin. For this study, all transportation  
32 emissions are modeled from the ground-level bin. All EGU emissions are modeled from the  
33 medium stacks bin. This methodology for EGU emissions allows us to work at the county level,  
34 the spatial resolution of our downscaled simulated emissions, and avoid matching (and  
35 potentially mismatching) simulated emissions to specific facilities in the tall bin.

36 It is important to understand the implications of this assumption and its limitations. Hence,  
37 we categorize the “existing fleet” of EGUs into bins based on available data. We analyze point  
38 source data provided by the NEI for facilities involved in power generation in 2017<sup>12</sup>. This  
39 dataset is then filtered to include only facilities located in counties modeled by Temoa in 2020.  
40 Out of the 1,105 observed EGUs in the resulting dataset, 35% lack the necessary data to compute  
41 effective heights. These facilities do not have smokestack parameters reported in EPA’s SMOKE  
42 flat files<sup>14</sup>, which we can hypothesize corresponds with facilities that do not have tall  
43 smokestacks. This gives us justification to assign them to the low stacks bin of AP3. Still, given  
44 the uncertainty associated with this assumption, we exclude these facilities from the low stacks  
45 bin in Table S.1 (tracking them instead a *NA*), which summarizes the number of facilities by AP3  
46 bin and sums total emissions for each.



1 Table S.1 shows that, in 2017, most effective heights among EGUs were below 500 meters  
 2 (again, corresponding with AP3's tall bin), with only about 3% exceeding that height. However,  
 3 the distribution of emissions tells a different story: no more than 10% of any pollutant was  
 4 emitted from facilities with effective heights under 250 meters (corresponding with AP3's low  
 5 bin). About one-third of facilities had effective heights between 250 and 500 meters  
 6 (corresponding with AP3's medium bin), yet these accounted for roughly two-thirds of total  
 7 emissions. Overall, most facilities do not have tall stacks, but most emissions are not from low  
 8 stacks.

9  
 10  
 11 *Table S.1: Electric generating units and NO<sub>x</sub>, primary PM<sub>2.5</sub>, and SO<sub>2</sub> emissions by effective height  
 12 and corresponding AP3 bin. Note: facilities and emissions characterize 2017 and are from the  
 13 National Emissions Inventory<sup>12</sup>. Smokestack parameters are from SMOKE flat files<sup>14</sup>.*

| Effective Height | Corresponding AP3 Bin | Electric Generating Units | Emissions       |                   |                 | Percentage by Bin |                   |                 |      |
|------------------|-----------------------|---------------------------|-----------------|-------------------|-----------------|-------------------|-------------------|-----------------|------|
|                  |                       |                           | NO <sub>x</sub> | PM <sub>2.5</sub> | SO <sub>2</sub> | NO <sub>x</sub>   | PM <sub>2.5</sub> | SO <sub>2</sub> |      |
| < 250 meters     | Low                   | 327                       | 30%             | 56.1              | 6.32            | 53.4              | 9.1%              | 10%             | 6.5% |
| 250-500 meters   | Medium                | 361                       | 33%             | 419               | 43.6            | 513               | 68%               | 71%             | 62%  |
| > 500 meters     | Tall                  | 34                        | 3.1%            | 141               | 11.0            | 258               | 23%               | 18%             | 31%  |
| NA               | Unknown               | 383                       | 35%             | 1.96              | 0.650           | 0.154             | 0.3%              | 1.1%            | 0.0% |

14  
 15 Notably, effective heights change over time because plume rise depends on varying  
 16 parameters such as exit velocity, gas temperature, and atmospheric conditions<sup>13</sup>. As a result,  
 17 some facilities with 2017 effective heights under 500 meters are still categorized in AP3's tall  
 18 stacks bin inventory due to the model's original structure<sup>10,11</sup>. The 52 EGUs that are included in  
 19 (1) the 1,105 observed EGUs in Table S.1 and (2) AP3's tall stacks bin inventory are evaluated  
 20 in the top panel of Table S.2. These 52 EGUs are included in AP3's tall stacks bin because of  
 21 taller effective heights that characterized the plants at previous points in time that may not still be  
 22 applicable or were otherwise not applicable in 2017. We summarize these EGUs below:

- 23
- 24 • 42 EGUs, accounting for 72% to 73% of emissions from these 52 EGUs, have 2017  
 25 effective heights corresponding with the medium bin (250 to 500 meters)
- 26 • 4 EGUs, accounting for 10% to 12% of emissions from these 52 EGUs, have 2017  
 27 effective heights corresponding with the low bin (less than 250 meters)
- 28 • 6 EGUs, accounting for 16% to 19% of emissions from these 52 EGUs, have 2017  
 29 effective heights corresponding with the tall bin (more than 500 meters)

30  
 31 Conversely, several facilities with 2017 effective heights above 500 meters are not included in  
 32 AP3's tall stacks bin inventory. This may be due to fluctuating effective heights over time or  
 33 because newer facilities with heights over 500 meters have been defaulted to AP3's medium  
 34 stacks bin. Of the 34 EGUs with 2017 effective heights exceeding 500 meters in Table S.1, 28  
 35 EGUs (82%) are not in AP3's tall stacks bin inventory and therefore are defaulted to the medium  
 36 stacks bin. These EGUs and the others outside of AP3's tall stacks bin inventory are summarized

1 in the bottom panel of Table S.2. AP3’s inflexible structure for tall stack (mostly EGU) facilities  
 2 is a limitation of the model, which is currently being addressed in ongoing research developing  
 3 its successor, AP4 <sup>16</sup>.

4  
 5 *Table S.2: Electric generating units within and outside of AP3’s tall stacks bin inventory. Note:*  
 6 *facilities with effective heights > 500 meters were modeled distinctly upon APEEP’s development*  
 7 *10,11.*

| Tall Stacks<br>Bin Inventory | Effective Height       | Electric         |      | Emissions       |                   |                 | Percentage by Bin |                   |                 |
|------------------------------|------------------------|------------------|------|-----------------|-------------------|-----------------|-------------------|-------------------|-----------------|
|                              |                        | Generating Units |      | NO <sub>x</sub> | PM <sub>2.5</sub> | SO <sub>2</sub> | NO <sub>x</sub>   | PM <sub>2.5</sub> | SO <sub>2</sub> |
| 52 EGUs<br>Within            | Low: < 250 meters      | 4                | 0.4% | 12.2            | 1.00              | 16.3            | 2.0%              | 1.6%              | 2.0%            |
|                              | Medium: 250-500 meters | 42               | 3.8% | 110             | 6.95              | 118             | 18%               | 11%               | 14%             |
|                              | Tall: > 500 meters     | 6                | 0.5% | 24.3            | 1.30              | 24.1            | 3.9%              | 2.1%              | 2.9%            |
| 1,053 EGUs<br>Outside        | Low: < 250 meters      | 323              | 29%  | 43.9            | 5.32              | 37.1            | 7.1%              | 8.6%              | 4.5%            |
|                              | Medium: 250-500 meters | 319              | 29%  | 310             | 36.6              | 395             | 50%               | 59%               | 48%             |
|                              | Tall: > 500 meters     | 28               | 2.5% | 116             | 9.71              | 234             | 19%               | 16%               | 28%             |
|                              | NA                     | 383              | 35%  | 1.96            | 0.650             | 0.154           | 0.3%              | 1.1%              | 0.0%            |

8  
 9 The takeaway is that bin assignment uncertainty and limitations exist whether or not we  
 10 specifically distribute facilities to different bins by effective heights. Since our Temoa modeling  
 11 does not operate at the facility level, assigning all EGU emissions to the medium stacks bin is the  
 12 most logical approach. This bin is the best representative for EGUs given the limited facility-  
 13 specific information available. Moreover, even if we attempted to allocate emissions from EGUs  
 14 with effective heights over 500 meters to AP3’s tall stacks bin, many would still default to the  
 15 medium stacks bin (Table S.2’s bottom panel). Additionally, many facilities that could be  
 16 assigned to the tall stacks bin are better suited for the medium stacks bin based on 2017 effective  
 17 heights (Table S.2’s top panel). The primary potential for missing effective height differentiation  
 18 lies with the low stacks bin, but these facilities contribute significantly fewer emissions than  
 19 those with effective heights greater than 250 meters, making facility-specific distribution a  
 20 persistent challenge.

21 AP3 uses source-receptor (S-R) matrices to model pollution concentrations in every receptor  
 22 contiguous US county from all sources of emissions. These matrices are built using Gaussian  
 23 plume mathematics, which characterizes three-dimensional atmospheric dispersion from the  
 24 point of release <sup>17-19</sup>. AP3 acts as a representation of annually averaged atmospheric conditions;  
 25 see Turner (1994) for a further explanation <sup>20</sup>.

26 The following equations depict the air quality modeling of AP3. First, as shown in Equation  
 27 S.1, emissions (e) from each source (S) are loaded in as vectors (E) by pollutant (p) and bin  
 28 height (h). The S-R matrices, shown in Equation S.2, model the transport (t) of a short ton of  
 29 pollution from each source to each receptor (R), again by pollutant and bin height. This transport  
 30 is specific for each pollutant, accounting for relevant chemistry and deposition processes.  
 31 Multiplying the emissions vectors by their associated S-R matrices, shown in Equation S.3,  
 32 provides speciated concentrations (C) of pollution, by pollutant and bin height, in each  
 33 contiguous US county resulting from all sources’ emissions. The concentrations are then added

1 across the different bin heights for total speciated ambient pollution in every county resulting  
 2 from emissions of NH<sub>3</sub>, NO<sub>x</sub>, primary PM<sub>2.5</sub>, SO<sub>2</sub>, and VOCs.

$$3 \quad E_{p,h} = \begin{bmatrix} e_1 \\ \vdots \\ e_S \end{bmatrix} \quad (\text{Equation S.1})$$

$$4 \quad SR_{p,h} = \begin{bmatrix} t_{1,1} & \cdots & t_{1,R} \\ \vdots & \ddots & \vdots \\ t_{S,1} & \cdots & t_{S,R} \end{bmatrix} \quad (\text{Equation S.2})$$

$$5 \quad C_{p,h} = (E_{p,h})^T \times (SR_{p,h}) \quad (\text{Equation S.3})$$

6 The formation of (NH<sub>4</sub>)<sub>2</sub>SO<sub>4</sub>, SO<sub>4</sub><sup>2-</sup>, and NH<sub>4</sub>NO<sub>3</sub> depends on the equilibrium between total  
 7 (gaseous plus particulate) ammonia, particulate sulfate, and total nitrate.<sup>1</sup> Specifically, AP3  
 8 models the interpollutant chemistry between ambient ammonia (ambient NH<sub>3</sub>), sulfuric acid  
 9 (H<sub>2</sub>SO<sub>4</sub>), and nitric acid (HNO<sub>3</sub>) as they form particulates<sup>21-23</sup>. AP3 then aggregates all  
 10 subspecies of ambient PM<sub>2.5</sub> to determine total concentrations in each county.

11 Ambient NH<sub>3</sub> reacts preferentially with H<sub>2</sub>SO<sub>4</sub> to form (NH<sub>4</sub>)<sub>2</sub>SO<sub>4</sub>. Any remaining, or free,  
 12 ambient NH<sub>3</sub> can then react with HNO<sub>3</sub> to form NH<sub>4</sub>NO<sub>3</sub>.<sup>2</sup> Two regimes affect this formation:  
 13 (1) nitrate-limited, where ambient NH<sub>3</sub> is in surplus, and (2) ammonium-limited, where HNO<sub>3</sub> is  
 14 in surplus. The efficiency with which marginal emissions of NH<sub>3</sub> and NO<sub>x</sub> form NH<sub>4</sub>NO<sub>3</sub>  
 15 depends on the regime in which a receptor county resides. Unlike emissions of NH<sub>3</sub> and NO<sub>x</sub>,  
 16 emissions of SO<sub>2</sub> will always contribute to ambient PM<sub>2.5</sub> formation, regardless of the  
 17 availability of ambient NH<sub>3</sub>, because SO<sub>4</sub><sup>2-</sup> is always in the particulate phase.

18 A critical caveat for this study is that we only use marginal PM<sub>2.5</sub> concentrations considering  
 19 a 2017 baseline. In other words, we assess simulated future emissions in their respective future  
 20 years, but the marginal PM<sub>2.5</sub> concentrations per short ton of future emissions are those modeled  
 21 in AP3 for 2017. Our use of a constant 2017 pollution baseline is based on data availability. The  
 22 NEI is released every three years, which determines the years that can be modeled using the  
 23 APEEP model (e.g., AP3 can model 2008, 2011, 2014, and 2017)<sup>6,8,25</sup>. Although the 2020 NEI  
 24 was released last year<sup>26</sup>, the development of this version of AP3 occurred before that release.  
 25 Even if we were to use the 2020 NEI (or the 2023 NEI, expected to be released in 2026),  
 26 concerns about changes in atmospheric chemistry profiles through 2050 would remain. The key  
 27 issue is the potential for substantial changes in the relative concentrations of one or more  
 28 pollutants between 2017 and 2050, which could significantly impact atmospheric chemistry in  
 29 the U.S. For the sake of our methods (i.e., a constant 2017 pollution baseline to which marginal  
 30 emissions contribute), it is ideal for the relative concentrations of the pollutants from emissions  
 31 of SO<sub>2</sub>, NO<sub>x</sub>, and NH<sub>3</sub> to remain consistent over time. That said, these relative concentrations are  
 32 likely to change in the future. For example, the policies evaluated in our study, which focus on  
 33 heavy sources of SO<sub>2</sub> and NO<sub>x</sub> emissions, would contribute to this change, *ceteris paribus*.

34 Evidence suggests that we should anticipate a future with abundant ambient NH<sub>3</sub> relative to  
 35 H<sub>2</sub>SO<sub>4</sub> and HNO<sub>3</sub>. Since the 2000s, SO<sub>2</sub> and NO<sub>x</sub> emissions in the U.S. have declined, while  
 36 NH<sub>3</sub> emissions have remained steady<sup>27</sup>. These trends are mostly expected to persist through

1

<sup>2</sup> SO<sub>2</sub> and NO<sub>x</sub> form H<sub>2</sub>SO<sub>4</sub> and HNO<sub>3</sub> when they react with oxygen (O<sub>2</sub>) and water (H<sub>2</sub>O). For example, 2SO<sub>2</sub> + O<sub>2</sub> + 2H<sub>2</sub>O → 2H<sub>2</sub>SO<sub>4</sub>. For more information on the atmospheric behavior of the family of NO<sub>x</sub> compounds, see<sup>24</sup>.

1 mid-century under the Representative Concentration Pathway (RCP) 4.5 scenario, although NH<sub>3</sub>  
2 emissions are likely to increase<sup>28–30</sup>. These contrasting trends are driven by expectations for key  
3 sectors. Tschofen et al. (2019) identified that SO<sub>2</sub>, NO<sub>x</sub>, and NH<sub>3</sub> damages were greatest from  
4 the utilities, transportation, and agriculture sectors, respectively<sup>8</sup>. While emissions reductions  
5 from the power sector and transportation are projected to continue<sup>31,32</sup>, research suggests that  
6 NH<sub>3</sub> emissions will rise due to higher temperatures from climate change<sup>33</sup> and increased  
7 agricultural activity to support a growing population<sup>34</sup>. However, there are existing methods to  
8 reduce NH<sub>3</sub> emissions from agriculture<sup>35</sup>, and Gu et al. (2021) found that NH<sub>3</sub> abatement is  
9 relatively cost-effective compared to NO<sub>x</sub> abatement<sup>36</sup>.

10 These expected changes are significant when considering the marginal concentrations ( $\mu$   
11 g/m<sup>3</sup>) we anticipate from SO<sub>2</sub> and NO<sub>x</sub> emissions (and NH<sub>3</sub>, though it is not the focus of this  
12 study). Below is a summary of the key points:

- 14 • In the future, we expect reductions in SO<sub>2</sub> and NO<sub>x</sub> emissions and increases in NH<sub>3</sub>  
15 emissions<sup>28</sup>. This will alter the relative concentrations influencing the ammonium,  
16 sulfate, and nitrate balance.
- 17 • As a result, SO<sub>2</sub> and NO<sub>x</sub> emissions are likely to become more damaging on the margin  
18 due to the relative surplus of ambient NH<sub>3</sub>.
- 19 • Pollution from SO<sub>2</sub> emissions will contribute to ambient PM<sub>2.5</sub> regardless of the presence  
20 of ambient NH<sub>3</sub>. Without ambient NH<sub>3</sub>, SO<sub>2</sub> will form particulate H<sub>2</sub>SO<sub>4</sub> at a minimum  
21 <sup>23</sup>. However, with higher NH<sub>3</sub> emissions, the formation of (NH<sub>4</sub>)<sub>2</sub>SO<sub>4</sub> becomes more  
22 likely.<sup>3</sup>
- 23 • In contrast, NO<sub>x</sub> emissions will not contribute to ambient PM<sub>2.5</sub> without free ambient  
24 NH<sub>3</sub>.<sup>4</sup> As NH<sub>3</sub> emissions increase, HNO<sub>3</sub> is more likely to form NH<sub>4</sub>NO<sub>3</sub>, which  
25 contributes to ambient PM<sub>2.5</sub>.

26  
27 In conclusion, SO<sub>2</sub> and NO<sub>x</sub> emissions are more damaging per ton on the margin in an NH<sub>3</sub>-  
28 saturated environment compared to an NH<sub>3</sub>-limited environment.

29  
30 Hernandez (2023), which examined the sensitivity of health damages to changes in  
31 atmospheric chemistry, provides relevant insights<sup>28</sup>. Using a chemical transport model, the study  
32 projected that marginal annual damages from ambient PM<sub>2.5</sub> associated with SO<sub>2</sub> and NO<sub>x</sub>  
33 emissions are expected to increase by 16% and 17%, respectively, from 2005 to 2055 when  
34 accounting only for interactions between sulfate, nitrate, and ammonium PM<sub>2.5</sub> components.  
35 These are relatively modest changes in marginal damages, supporting the use of RCMs even for  
36 analyses decades in the future with different emissions baselines. Additionally, since our focus is  
37 on changes from 2017 to 2055, we need to account for the fact that over a decade of emissions  
38 reductions from SO<sub>2</sub> and NO<sub>x</sub> already influences AP3's baseline. This period includes the most

---

<sup>3</sup> (NH<sub>4</sub>)<sub>2</sub>SO<sub>4</sub> is more damaging than H<sub>2</sub>SO<sub>4</sub> when derived from the same quantity of SO<sub>2</sub> emissions. This is best illustrated by comparing their molecular weights: 132 g/mol for (NH<sub>4</sub>)<sub>2</sub>SO<sub>4</sub> and 98 g/mol for H<sub>2</sub>SO<sub>4</sub>.

<sup>4</sup> AP3 assumes that all NO<sub>x</sub> emissions contribute to ambient PM<sub>2.5</sub>, even in the absence of free ambient NH<sub>3</sub> (based on the modeled reaction between H<sub>2</sub>SO<sub>4</sub> and NH<sub>3</sub>). Since AP3 models annual average concentrations, it would be inaccurate to assume that no ambient PM<sub>2.5</sub> from NO<sub>x</sub> would occur without modeled free NH<sub>3</sub>. For instance, there may be periods during the year with high levels of ambient NH<sub>3</sub> and low levels of H<sub>2</sub>SO<sub>4</sub>, contrary to more typical conditions. On such days, HNO<sub>3</sub> could react with the available NH<sub>3</sub> to form NH<sub>4</sub>NO<sub>3</sub>. The statistics used in AP3 for this calculation are derived from calibration efforts involving the Comprehensive Air Quality Model with extensions (CAMx) model<sup>37,38</sup>.

1 significant decrease in SO<sub>2</sub> and NO<sub>x</sub> emissions relative to future years<sup>28</sup>. By 2017, AP3’s  
 2 baseline indicated that most counties had some level of free ambient NH<sub>3</sub>, based on annual  
 3 average concentrations. Therefore, by 2017, SO<sub>2</sub> was likely already forming more damaging  
 4 (NH<sub>4</sub>)<sub>2</sub>SO<sub>4</sub>. The formation of NH<sub>4</sub>NO<sub>3</sub> from NO<sub>x</sub> would vary by county depending on the extent  
 5 of the availability of free NH<sub>3</sub>. As a result, the expected increases in damages from SO<sub>2</sub> and NO<sub>x</sub>  
 6 emissions from 2017 to 2055 (rather than from 2005 to 2055) are likely to be less than the  
 7 projected 16% and 17% increases.

8 Importantly, Hernandez (2023) also examined the extent to which NO<sub>x</sub> contributes to  
 9 tropospheric ozone in 2005 versus 2055<sup>28</sup>. Ozone is a significant oxidant for VOCs, which form  
 10 ambient PM<sub>2.5</sub> as secondary organic aerosols (SOAs). The study found that the marginal  
 11 damages from NO<sub>x</sub> emissions related to ozone formation are expected to increase by more than  
 12 500% from 2005 to 2055. This represents a limitation of the AP3 model and our study, as they  
 13 do not account for the ambient PM<sub>2.5</sub> impacts of ozone on SOA formation or the health impacts  
 14 of tropospheric ozone itself<sup>39,40</sup>. On the whole, Hernandez found that NO<sub>x</sub> damages (including  
 15 both organic and inorganic sources) would approximately double from 2005 to 2055.

16 Conversely, our analysis does not factor in the benefits associated with reduced ambient  
 17 PM<sub>2.5</sub> from marginal NH<sub>3</sub> emissions due to fewer SO<sub>2</sub> and NO<sub>x</sub> emissions. These co-benefits will  
 18 accrue because ambient NH<sub>3</sub> will not contribute to PM<sub>2.5</sub> formation without H<sub>2</sub>SO<sub>4</sub> or HNO<sub>3</sub> to  
 19 react with. In fact, marginal damages from NH<sub>3</sub> emissions are projected to decline by 67% from  
 20 2005 to 2055<sup>28</sup>.

21 In summary, assuming that ambient NH<sub>3</sub> remains as relatively abundant as it was in 2017 is a  
 22 straightforward and reasonable approach given the discussion above. The marginal ambient  
 23 PM<sub>2.5</sub> concentrations from SO<sub>2</sub> emissions are likely to be associated with (NH<sub>4</sub>)<sub>2</sub>SO<sub>4</sub>, both in  
 24 2017 and in the future. However, we can assert with confidence that these will not increase by  
 25 more than 16% by mid-century. For NO<sub>x</sub> emissions, the impacts vary by receptor location  
 26 depending on the availability of free ambient NH<sub>3</sub>, but we can reasonably assume that the net  
 27 damages may double by mid-century. While adjusting our baseline for future assessments could  
 28 provide more precise estimates, it would introduce significant complexities and potential  
 29 distortions in our results.

30 We again note that our work is comparative in nature. As with our 2017 concentrations, we  
 31 can assume that any errors in our future projections will be uniformly distributed (e.g., if NO<sub>x</sub>  
 32 becomes more damaging, it will be more damaging “everywhere”). The primary concern is  
 33 whether there is a systematic link between agricultural activity (and NH<sub>3</sub> emissions) and (1)  
 34 changes in emissions from electric generating units and transportation or (2) the locations of the  
 35 subpopulations assessed in our study. We leave such investigations and further efforts to project  
 36 atmospheric chemistry conditions to future research.

37 AP3 is calibrated using EPA Air Quality System (AQS) monitoring data<sup>41</sup>. Key statistics are  
 38 the mean fractional error (MFE) and mean fractional bias (MFB), defined below—Equations S.4  
 39 and S.5, respectively. Model predictions of ambient concentrations ( $C_{m,i}$ ) are compared to  
 40 observed levels of ambient concentrations ( $C_{o,i}$ ) for receptor county locations with AQS  
 41 monitoring data ( $i$ ):

$$42 \quad MFE = \frac{1}{n} \sum_{i=1}^n \frac{|c_{m,i} - c_{o,i}|}{\left(\frac{c_{m,i} + c_{o,i}}{2}\right)} \quad (\text{Equation S.4})$$

$$43 \quad MFB = \frac{1}{n} \sum_{i=1}^n \frac{c_{m,i} - c_{o,i}}{\left(\frac{c_{m,i} + c_{o,i}}{2}\right)} \quad (\text{Equation S.5})$$

1  
2 AP3 is calibrated using the observed data. The procedure compares AP3-modeled ambient  
3 PM<sub>2.5</sub> concentrations to those measured at monitors and conducts several calibration steps to  
4 improve the prediction-observation fit. The primary calibration step is an iterative approach that  
5 reduces the MFE and the MFB by adjusting calibration coefficients applied alongside the source-  
6 receptor matrices. A secondary calibration step is also taken to adjust the share of ambient PM<sub>2.5</sub>  
7 from primary PM<sub>2.5</sub> emissions for the 2.5th percentile of counties with the greatest absolute  
8 difference between modeled and monitored pollution. Subsequently, in a tertiary calibration step,  
9 neighboring counties surrounding the secondary calibration-adjusted counties are also considered  
10 for adjustment, where monitoring data and modeling estimates support such decisions.

11  
12  
13 *Table S.3: Performance metrics for AP3 following calibration. Note: monitored data are*  
14 *from the Environmental Protection Agency’s Air Quality System*<sup>41</sup>. *r = Pearson’s correlation*  
15 *coefficient. n = number of AQS-monitored counties for each pollutant. Calibration efforts are*  
16 *from*<sup>42,43</sup>.

| Year | Ambient Pollutant             | Performance Metrics |              |              |            |
|------|-------------------------------|---------------------|--------------|--------------|------------|
|      |                               | MFE                 | MFB          | r            | n          |
|      | <b>Total PM<sub>2.5</sub></b> | <b>0.292</b>        | <b>0.012</b> | <b>0.523</b> | <b>603</b> |
| 2017 | Sulfate                       | 0.329               | -0.105       | 0.699        | 255        |
|      | Nitrate                       | 0.492               | 0.070        | 0.624        | 251        |
|      | Organic Aerosols              | 0.398               | -0.043       | 0.450        | 247        |
|      | Ammonium                      | 0.996               | 0.995        | 0.546        | 132        |

17  
18 These calibration efforts were conducted as part of the 2017 NEI update to AP3. We attribute  
19 the calibration work to Tschofen et al. (2023)<sup>42</sup> and Tschofen (2023)<sup>43</sup>. Furthermore, the  
20 calibration procedure built upon previous work<sup>25,37,44</sup>. Table S.3 summarizes the performance  
21 metrics for AP3 following calibration. AP3 performs within the performance standards set by the  
22 literature and summarized below<sup>45,46</sup>:

23 Boylan & Russell (2006): According to<sup>45</sup>, a MFE ≤ +50% and a MFB ≤ ±30% suggests that  
24 a model has met its performance goal.<sup>45</sup> also notes that an MFE ≤ +75% and an MFB ≤ ±60%  
25 are acceptable for modeling and that minor species should have less stringent requirements. The  
26 Intervention Model for Air Pollution (InMAP) model<sup>47</sup> also considers this performance  
27 standard.

- 28 • Morris et al. (2005): According to<sup>46</sup>, an MFE ≤ +35% and an MFB ≤ ±15% suggests that  
29 a model achieves “excellent” performance.<sup>46</sup> also classified an MFE ≤ +50% and an  
30 MFB ≤ ±30% (i.e., the main standard from<sup>45</sup>) as “good” performance. The Estimating  
31 Air pollution Social Impact Using Regression (EASIUR) model<sup>48</sup> also considers this  
32 performance standard.

33  
34 For total PM<sub>2.5</sub> and sulfate, AP3 meets the “excellent” performance standard from Morris et  
35 al. (2005)<sup>46</sup>. Nitrate and organic aerosols meet the standard from Boylan & Russell (2006)<sup>45</sup>.  
36 Ammonium is the one subspecies that has a lower performance. We again emphasize that<sup>45</sup>

1 noted that minor species should have less stringent requirements and that ammonia is not a focus  
2 of this study.

3 AP3 builds out a pollution baseline, but its outputs are the marginal impacts of emissions—  
4 e.g., additional PM<sub>2.5</sub> concentrations in downwind locations from a small increase in emissions  
5 from a particular source. In other words, once the baseline concentrations are determined by  
6 modeling all emissions<sup>12</sup>, policy analyses are conducted by running emissions experiments as  
7 outlined in the following steps:

- 8
- 9 1. Set the model to its baseline (i.e., PM<sub>2.5</sub> in every county from all emissions).
- 10 2. Add one short ton of emissions for one pollutant from an individual source.
- 11 3. Compute the marginal concentrations in every receptor county by subtracting baseline  
12 concentrations from the new concentrations with the marginal short ton added.
- 13 4. Reset the model to its baseline.
- 14 5. Repeat 2-4 for each source and pollutant combination.

15

16 Marginal concentrations of PM<sub>2.5</sub> are the output of AP3's air quality modeling for this study.  
17 Then, we multiply total (avoided) emissions by their associated marginal concentrations for total  
18 (avoided) PM<sub>2.5</sub> concentrations in every receptor county. This is an approach based on that  
19 conducted in previous work—e.g.,<sup>6,8,25,49</sup>.

## 20

### 21 V. Mortality Risk and Scenarios

22 We use a dose-response function from the epidemiological literature, shown in Equation S.6,  
23 to associate exposure to ambient PM<sub>2.5</sub> with premature mortality risk. The dose-response  
24 function models the expected change in mortality rates across populations from a change in  
25 PM<sub>2.5</sub>. The inputs to the function are a  $\beta$  coefficient, the baseline mortality rate of the exposed  
26 population ( $y_0$ ), and the change in ambient PM<sub>2.5</sub> pollution ( $\Delta PM$ ).  $\beta$  is further defined in  
27 Equation S.7.  $\beta$  is the natural log of the relative risk ( $RR$ ) with a change in PM<sub>2.5</sub>. Multiplying the  
28 expected change in mortality rate ( $\Delta y$ ) by the corresponding population, depicted in Equation  
29 S.8, yields the premature mortality associated with the change in PM<sub>2.5</sub>.

$$30 \quad \Delta y = y_0 \left( 1 - \frac{1}{\exp(\beta \times \Delta PM)} \right) \quad (S.6)$$

$$31 \quad \beta = \frac{\ln(RR)}{\Delta PM} \quad (S.7)$$

$$32 \quad \Delta Mortality = \Delta y \times Population \quad (S.8)$$

33 Table S.4 shows the mortality scenarios used in this study. Krewski et al. (2009) reported  
34 information for populations of 30 or older<sup>50</sup>. The study reported relative risk (i.e., the chances of  
35 an event occurring in an exposed group vs. the chances of it happening in a control group) of all-  
36 cause mortality associated with a 10  $\mu\text{g}/\text{m}^3$  increase in ambient PM<sub>2.5</sub> exposure. This relative risk  
37 is used in Scenario 1 of Table S.4.

1 *Table S.4: Input parameters for concentration-response function. Note: relative risk and*  
 2 *baseline mortality are held constant across model time periods due to data availability.*

|            | Relative risk [source]            | Baseline mortality                  |
|------------|-----------------------------------|-------------------------------------|
| Scenario 1 | 1.06 [ACS: Krewski et al. (2009)] | Changes with race-ethnicity and age |
|            | Black non-Hispanic: 1.208         |                                     |
|            | White non-Hispanic: 1.063         |                                     |
| Scenario 2 | Hispanic: 1.116                   |                                     |
|            | Other: 1.096                      | Changes with race-ethnicity and age |
|            | [Di et al. (2017)]                |                                     |
| Scenario 3 | 1.06 [ACS: Krewski et al. (2009)] | Changes with age                    |

3  
 4 Di et al. (2017) reported information for populations of 65 or older <sup>51</sup>. The study also  
 5 reported relative risk of all-cause mortality associated with a 10 µg/m<sup>3</sup> increase in ambient PM<sub>2.5</sub>  
 6 exposure. However, Di et al. (2017) also reported relative risk differentiated by race/ethnicity  
 7 subpopulation. As discussed in the manuscript, we assume these differentiated relative risks to  
 8 apply not only to the studied population (i.e., 65 or older) but also to other adults found to  
 9 experience damage by Krewski et al. (2009) (i.e., 30 or older). We assert that this methodology  
 10 is not informed by the epidemiological literature but rather by the reasonable assumption that  
 11 disparities existing for older age intervals may also exist for younger age intervals. These relative  
 12 risks are used in Scenario 2 of Table S.4.

13 County-level mortality rate data are derived using population and mortality data from the  
 14 CDC’s WONDER <sup>52,53</sup>. Data are reported by county, age group, and, optionally, race/ethnicity.  
 15 Where data are not available to compute mortality rates, first the state average, then the US  
 16 Health and Human Services region average, and then the national average mortality rates are  
 17 substituted in, as necessary. Table S.4’s Scenario 1 and Scenario 2 consider mortality rates by  
 18 county, age group, and race/ethnicity. Table S.4’s Scenario 3 considers mortality rates by only  
 19 county and age group.

20 A critical caveat for this study is that we only use mortality rates in 2017. Since our analysis  
 21 extends far into the future, we miss potentially notable changes in baseline mortality rates. These  
 22 could be related to various trends (e.g., changes in the health care system). Future work could  
 23 further incorporate expected future mortality rates into prospective analyses such as that  
 24 conducted herein.  
 25

## 26 **VI. Marginal Damages by Effective Height**

27 Because we model all EGUs from the medium stacks bin of AP3 (250 meters < effective  
 28 height < 500 meters), it is important to explore the differences in impacts from various bin  
 29 heights and consider how our results might change when using the low stacks or tall stacks bins  
 30 instead of our default medium stacks procedure. Table S. presents emissions-weighted marginal  
 31 damages (in deaths per short ton) for NO<sub>x</sub>, primary PM<sub>2.5</sub>, and SO<sub>2</sub> from all sources of pollution  
 32 across the contiguous U.S. in 2017, as reported by the NEI <sup>12</sup>. The concentration-response



1 function uses relative risk from Krewski et al. (2009)<sup>50</sup> and all-person population counts and  
 2 baseline mortality rates, both differentiated by age, provided by the CDC<sup>52,53</sup>.

3  
 4 *Table S.5: Marginal damages (in deaths per short ton) by AP3 bin. Note: marginal damages are*  
 5 *emissions-weighted from all sources of pollution across the contiguous U.S. in 2017 as reported*  
 6 *by the National Emissions Inventory*<sup>12</sup>.

| Variable                               | AP3 Bin | Pollutant       |                   |                 |
|----------------------------------------|---------|-----------------|-------------------|-----------------|
|                                        |         | NO <sub>x</sub> | PM <sub>2.5</sub> | SO <sub>2</sub> |
| Marginal Damages<br>(Deaths/Short Ton) | Low     | 1.89E-03        | 1.54E-02          | 7.44E-03        |
|                                        | Medium  | 1.05E-03        | 8.77E-03          | 4.29E-03        |
|                                        | Tall    | 9.55E-04        | 5.00E-03          | 4.11E-03        |
| Versus<br>Medium                       | Low     | +80%            | +76%              | +73%            |
|                                        | Tall    | -9.0%           | -43%              | -4.2%           |

7  
 8 Facilities in AP3’s low bin have significantly higher marginal damages on average  
 9 compared to the medium bin. Specifically, deaths per ton of NO<sub>x</sub>, primary PM<sub>2.5</sub>, and SO<sub>2</sub> are  
 10 81%, 76%, and 73% greater, respectively. Conversely, facilities in the tall bin have lower  
 11 marginal damages on average than those in the medium stacks bin, with deaths per ton of NO<sub>x</sub>,  
 12 primary PM<sub>2.5</sub>, and SO<sub>2</sub> being 9%, 43%, and 4% lower, respectively. Marginal damages from  
 13 taller facilities are typically lower because their smokestacks are designed to disperse  
 14 concentrated pollution away from ground-level populations, whereas lower facilities tend to have  
 15 the opposite effect.

16 While Table S.5 demonstrates that low or tall facilities/emissions attributed to the  
 17 medium bin could be notably mischaracterized, we again highlight that the goal of our paper is  
 18 comparative in nature. Our focus is on how air quality changes for different populations under  
 19 different pathways. In short, where we error, we error the same for all pathways. While the  
 20 marginal concentrations and marginal damages from EGUs with lower effective heights may be  
 21 higher and from EGUs with higher effective heights may be lower, we can assume that they will  
 22 do so uniformly or randomly. We note that this is not a strictly valid assumption if there is a  
 23 correlation between low or tall facilities/emissions and (1) where EGU emissions change  
 24 (relative to other EGU emissions) or (2) where the subpopulations assessed herein live.  
 25 However, we leave that investigation as well as any further efforts to evaluate our atmospheric  
 26 transport assumptions to future work.

27  
 28 **Supplemental Information References**

- 29  
 30 (1) US Energy Information Administration. *Preliminary Monthly Electric Generator Inventory*  
 31 *(based on Form EIA-860M as a supplement to Form EIA-860)*.  
 32 <https://www.eia.gov/electricity/data/eia860m/index.php> (accessed 2022-03-17).  
 33 (2) DeCarolis, J.; Daly, H.; Dodds, P.; Keppo, I.; Li, F.; McDowall, W.; Pye, S.; Strachan, N.;  
 34 Trutnevyte, E.; Usher, W.; Winning, M.; Yeh, S.; Zeyringer, M. Formalizing Best Practice

- 1 for Energy System Optimization Modelling. *Applied Energy* **2017**, *194*, 184–198.  
2 <https://doi.org/10.1016/j.apenergy.2017.03.001>.
- 3 (3) US Energy Information Administration. *Frequently Asked Questions (FAQs)*.  
4 <https://www.eia.gov/tools/faqs/faq.php> (accessed 2023-03-06).
- 5 (4) US Environmental Protection Agency’s Office of Air and Radiation (OAR). *2017 National*  
6 *Emissions Inventory (NEI) Data*; Other Policies and Guidance; Air Emissions Inventories,  
7 2017. [https://www.epa.gov/air-emissions-inventories/2017-national-emissions-inventory-](https://www.epa.gov/air-emissions-inventories/2017-national-emissions-inventory-nei-data)  
8 [nei-data](https://www.epa.gov/air-emissions-inventories/2017-national-emissions-inventory-nei-data) (accessed 2022-05-09).
- 9 (5) US Environmental Protection Agency’s Office of Air and Radiation (OAR). *Emissions &*  
10 *Generation Resource Integrated Database (eGRID)*. <https://www.epa.gov/egrid> (accessed  
11 2023-03-06).
- 12 (6) Dennin, L. R.; Muller, N. Z. Funding a Just Transition Away from Coal in the U.S.  
13 Considering Avoided Damage from Air Pollution. *Manuscript Submitted for Publication*  
14 **2024**.
- 15 (7) Clay, K.; Jha, A.; Muller, N.; Walsh, R. External Costs of Transporting Petroleum Products:  
16 Evidence from Shipments of Crude Oil from North Dakota by Pipelines and Rail. *The*  
17 *Energy Journal* **2019**, *40* (1), 55–73. <https://doi.org/10.5547/01956574.40.1.kcla>.
- 18 (8) Tschofen, P.; Azevedo, I. L.; Muller, N. Z. Fine Particulate Matter Damages and Value  
19 Added in the US Economy. *Proc Natl Acad Sci USA* **2019**, *116* (40), 19857–19862.  
20 <https://doi.org/10.1073/pnas.1905030116>.
- 21 (9) Muller, N. Z. *AP4 (AP3, AP2, APEEP) Model*. Nick Muller’s Home Page.  
22 <https://nickmuller.tepper.cmu.edu/APModel.aspx> (accessed 2024-03-23).
- 23 (10) Muller, N. Z.; Mendelsohn, R. Measuring the Damages of Air Pollution in the United  
24 States. *Journal of Environmental Economics and Management* **2007**, *54* (1), 1–14.  
25 <https://doi.org/10.1016/j.jeem.2006.12.002>.
- 26 (11) Muller, N.; Mendelsohn, R. The Air Pollution Emission Experiments and Policy Analysis  
27 Model (APEEP) Technical Appendix. **2014**.
- 28 (12) U.S. EPA’s Office of Air and Radiation. *2017 National Emissions Inventory (NEI) Data*.  
29 Air Emissions Inventories. [https://www.epa.gov/air-emissions-inventories/2017-national-](https://www.epa.gov/air-emissions-inventories/2017-national-emissions-inventory-nei-data)  
30 [emissions-inventory-nei-data](https://www.epa.gov/air-emissions-inventories/2017-national-emissions-inventory-nei-data) (accessed 2022-05-09).
- 31 (13) Turner, D. B. 3: Effective Height of Emission. In *Workbook of Atmospheric Dispersion*  
32 *Estimates: An Introduction to Dispersion Modeling*; CRC Press, Inc.: Boca Raton, FL,  
33 1994; p 3.1-3.8.
- 34 (14) U.S. EPA’s Office of Air and Radiation. *Emissions Modeling Platforms*. Air Emissions  
35 Modeling. [https://gaftp.epa.gov/Air/nei/2017/doc/flat\\_files/](https://gaftp.epa.gov/Air/nei/2017/doc/flat_files/) (accessed 2020-05-20).
- 36 (15) NOAA’s Physical Sciences Laboratory. *NCEP-NCAR Reanalysis I*. Gridded Climate Data:  
37 NCEP/NCAR Reanalysis. <https://psl.noaa.gov/data/gridded/data.ncep.reanalysis.html>  
38 (accessed 2022-04-27).
- 39 (16) Dennin, L. R.; Nock, D.; Muller, N. Z.; Akindele, M.; Adams, P. J. Modeling Wildland Fire  
40 Smoke Damages in the U.S. and Unpacking Impact Disparities by Social Vulnerability.  
41 *Manuscript Under Review* **2024**.
- 42 (17) Turner, D. B. 2: Estimates of Atmospheric Dispersion. In *Workbook of Atmospheric*  
43 *Dispersion Estimates: An Introduction to Dispersion Modeling*; CRC Press, Inc.: Boca  
44 Raton, FL, 1994; p 2.1-2.38.

- 1 (18) Ramaswami, A.; Milford, J. B.; Small, M. J. Models of Transport in Air. In *Integrated*  
2 *Environmental Modeling: Pollutant Transport, Fate, and Risk in the Environment*; John  
3 Wiley & Sons, Inc.: Hoboken, NJ, 2005; pp 280–314.
- 4 (19) Seinfeld, J. H.; Pandis, S. N. Atmospheric Diffusion. In *Atmospheric Chemistry and*  
5 *Physics: From Air Pollution to Climate Change*; John Wiley & Sons, Inc.: Hoboken, NJ,  
6 2016; pp 763–828.
- 7 (20) Turner, D. B. 4: Special Topics. In *Workbook of Atmospheric Dispersion Estimates: An*  
8 *Introduction to Dispersion Modeling*; CRC Press, Inc.: Boca Raton, FL, 1994; p 4.1-4.29.
- 9 (21) Xu, G.; Zhang, Q.; Yao, Y.; Zhang, X. Changes in PM<sub>2.5</sub> Sensitivity to NO<sub>x</sub> and NH<sub>3</sub>  
10 Emissions Due to a Large Decrease in SO<sub>2</sub> Emissions from 2013 to 2018. *Atmospheric and*  
11 *Oceanic Science Letters* **2020**, *13* (3), 210–215.  
12 <https://doi.org/10.1080/16742834.2020.1738009>.
- 13 (22) Saylor, R.; Myles, L.; Sibble, D.; Caldwell, J.; Xing, J. Recent Trends in Gas-Phase  
14 Ammonia and PM<sub>2.5</sub> Ammonium in the Southeast United States. *Journal of the Air &*  
15 *Waste Management Association* **2015**, *65* (3), 347–357.  
16 <https://doi.org/10.1080/10962247.2014.992554>.
- 17 (23) Tsimpidi, A. P.; Karydis, V. A.; Pandis, S. N. Response of Inorganic Fine Particulate  
18 Matter to Emission Changes of Sulfur Dioxide and Ammonia: The Eastern United States as  
19 a Case Study. *Journal of the Air & Waste Management Association* **2007**, *57* (12), 1489–  
20 1498. <https://doi.org/10.3155/1047-3289.57.12.1489>.
- 21 (24) U.S. EPA’s Clean Air Technology Center. *Nitrogen Oxides (NO<sub>x</sub>), Why and How They Are*  
22 *Controlled*; EPA-456/F-99-006R; U.S. Environmental Protection Agency: Research  
23 Triangle Park, NC, 1999. <https://www3.epa.gov/ttnecat1/dir1/fnoxdoc.pdf>.
- 24 (25) Jaramillo, P.; Muller, N. Z. Air Pollution Emissions and Damages from Energy Production  
25 in the U.S.: 2002–2011. *Energy Policy* **2016**, *90*, 202–211.  
26 <https://doi.org/10.1016/j.enpol.2015.12.035>.
- 27 (26) U.S. EPA’s Office of Air and Radiation. *2020 National Emissions Inventory (NEI) Data.*  
28 *Air Emissions Inventories.* [https://www.epa.gov/air-emissions-inventories/2020-national-](https://www.epa.gov/air-emissions-inventories/2020-national-emissions-inventory-nei-data)  
29 [emissions-inventory-nei-data](https://www.epa.gov/air-emissions-inventories/2020-national-emissions-inventory-nei-data) (accessed 2023-03-07).
- 30 (27) Yu, F.; Nair, A. A.; Luo, G. Long-Term Trend of Gaseous Ammonia Over the United  
31 States: Modeling and Comparison With Observations. *J Geophys Res Atmos* **2018**, *123*  
32 (15), 8315–8325. <https://doi.org/10.1029/2018JD028412>.
- 33 (28) Hernandez, C. Decision-Making Tools for the Mitigation of Particulate Matter Health  
34 Impacts. thesis, Carnegie Mellon University, 2023.  
35 <https://doi.org/10.1184/R1/22321054.v1>.
- 36 (29) Wise, M.; Calvin, K.; Thomson, A.; Clarke, L.; Bond-Lamberty, B.; Sands, R.; Smith, S. J.;  
37 Janetos, A.; Edmonds, J. Implications of Limiting CO<sub>2</sub> Concentrations for Land Use and  
38 Energy. *Science* **2009**, *324* (5931), 1183–1186. <https://doi.org/10.1126/science.1168475>.
- 39 (30) Smith, S. J.; Wigley, T. M. L. Multi-Gas Forcing Stabilization with Minicam. *The Energy*  
40 *Journal* **2006**, *27* (3\_suppl), 373–392. [https://doi.org/10.5547/ISSN0195-6574-EJ-](https://doi.org/10.5547/ISSN0195-6574-EJ-VolSI2006-NoSI3-19)  
41 [VolSI2006-NoSI3-19](https://doi.org/10.5547/ISSN0195-6574-EJ-VolSI2006-NoSI3-19).
- 42 (31) Grubert, E. Emissions Projections for US Utilities through 2050. *Environ. Res. Lett.* **2021**,  
43 *16* (8), 084049. <https://doi.org/10.1088/1748-9326/ac1628>.
- 44 (32) Campbell, P.; Zhang, Y.; Yan, F.; Lu, Z.; Streets, D. Impacts of Transportation Sector  
45 Emissions on Future U.S. Air Quality in a Changing Climate. Part I: Projected Emissions,

- 1 Simulation Design, and Model Evaluation. *Environmental Pollution* **2018**, 238, 903–917.  
2 <https://doi.org/10.1016/j.envpol.2018.04.020>.
- 3 (33) Sutton, M. A.; Reis, S.; Riddick, S. N.; Dragosits, U.; Nemitz, E.; Theobald, M. R.; Tang,  
4 Y. S.; Braban, C. F.; Vieno, M.; Dore, A. J.; Mitchell, R. F.; Wanless, S.; Daunt, F.;  
5 Fowler, D.; Blackall, T. D.; Milford, C.; Flechard, C. R.; Loubet, B.; Massad, R.; Cellier,  
6 P.; Personne, E.; Coheur, P. F.; Clarisse, L.; Van Damme, M.; Ngadi, Y.; Clerbaux, C.;  
7 Skjøth, C. A.; Geels, C.; Hertel, O.; Wichink Kruit, R. J.; Pinder, R. W.; Bash, J. O.;  
8 Walker, J. T.; Simpson, D.; Horváth, L.; Misselbrook, T. H.; Bleeker, A.; Dentener, F.; de  
9 Vries, W. Towards a Climate-Dependent Paradigm of Ammonia Emission and Deposition.  
10 *Philos Trans R Soc Lond B Biol Sci* **2013**, 368 (1621), 20130166.  
11 <https://doi.org/10.1098/rstb.2013.0166>.
- 12 (34) Malley, C. S.; Hicks, W. K.; Kulyenstierna, J. C. I.; Michalopoulou, E.; Molotoks, A.;  
13 Slater, J.; Heaps, C. G.; Ulloa, S.; Veysey, J.; Shindell, D. T.; Henze, D. K.; Nawaz, O.;  
14 Anenberg, S. C.; Mantlana, B.; Robinson, T. P. Integrated Assessment of Global Climate,  
15 Air Pollution, and Dietary, Malnutrition and Obesity Health Impacts of Food Production  
16 and Consumption between 2014 and 2018. *Environ. Res. Commun.* **2021**, 3 (7), 075001.  
17 <https://doi.org/10.1088/2515-7620/ac0af9>.
- 18 (35) Domingo, N. G. G.; Balasubramanian, S.; Thakrar, S. K.; Clark, M. A.; Adams, P. J.;  
19 Marshall, J. D.; Muller, N. Z.; Pandis, S. N.; Polasky, S.; Robinson, A. L.; Tessum, C. W.;  
20 Tilman, D.; Tschofen, P.; Hill, J. D. Air Quality–Related Health Damages of Food.  
21 *Proceedings of the National Academy of Sciences* **2021**, 118 (20), e2013637118.  
22 <https://doi.org/10.1073/pnas.2013637118>.
- 23 (36) Gu, B.; Zhang, L.; Van Dingenen, R.; Vieno, M.; Van Grinsven, H. J.; Zhang, X.; Zhang,  
24 S.; Chen, Y.; Wang, S.; Ren, C.; Rao, S.; Holland, M.; Winiwarter, W.; Chen, D.; Xu, J.;  
25 Sutton, M. A. Abating Ammonia Is More Cost-Effective than Nitrogen Oxides for  
26 Mitigating PM<sub>2.5</sub> Air Pollution. *Science* **2021**, 374 (6568), 758–762.  
27 <https://doi.org/10.1126/science.abf8623>.
- 28 (37) Sergi, B. J. Integrating Climate and Health Damages in Decision-Making for the Electric  
29 Power Sector. thesis, Carnegie Mellon University, 2019.  
30 <https://doi.org/10.1184/R1/8204723.v1>.
- 31 (38) Ramboll. *A multi-scale photochemical modeling system for gas and particulate air*  
32 *pollution: Comprehensive Air Quality Model with Extensions*. CAMx.  
33 <http://www.camx.com/home/> (accessed 2023-01-10).
- 34 (39) Jerrett, M.; Burnett, R. T.; Pope, C. A.; Ito, K.; Thurston, G.; Krewski, D.; Shi, Y.; Calle,  
35 E.; Thun, M. Long-Term Ozone Exposure and Mortality. *N Engl J Med* **2009**, 360 (11),  
36 1085–1095. <https://doi.org/10.1056/NEJMoa0803894>.
- 37 (40) Turner, M. C.; Jerrett, M.; Pope, C. A.; Krewski, D.; Gapstur, S. M.; Diver, W. R.;  
38 Beckerman, B. S.; Marshall, J. D.; Su, J.; Crouse, D. L.; Burnett, R. T. Long-Term Ozone  
39 Exposure and Mortality in a Large Prospective Study. *Am J Respir Crit Care Med* **2016**,  
40 193 (10), 1134–1142. <https://doi.org/multi>.
- 41 (41) U.S. EPA’s Office of Air and Radiation. *Air Quality System (AQS): Pregenerated Data*  
42 *Files*. Air Data: Air Quality Data Collected at Outdoor Monitors Across the US.  
43 [https://aqsweb.epa.gov/aqswweb/airdata/download\\_files.html](https://aqsweb.epa.gov/aqswweb/airdata/download_files.html) (accessed 2022-11-21).
- 44 (42) Tschofen, P.; Muller, N. Z.; Dennin, L. R.; Azevedo, I. L. Climate, Air, and Environmental  
45 Damages Call for a Reevaluation of Regulatory Priorities for Emissions in the United  
46 States. *Manuscript in Preparation* **2023**.

- 1 (43) Tschofen, P. Essays in Pollution Accounting. Ph.D., Carnegie Mellon University, 2023.  
2 <https://www.proquest.com/docview/2810802384/abstract/87EAA1C075C54D49PQ/1>  
3 (accessed 2023-09-15).
- 4 (44) Sergi, B. J.; Azevedo, I.; Davis, S. J.; Muller, N. Z. Regional and County Flows of  
5 Particulate Matter Damage in the US. *Environ. Res. Lett.* **2020**, *15* (10), 104073.  
6 <https://doi.org/10.1088/1748-9326/abb429>.
- 7 (45) Boylan, J. W.; Russell, A. G. PM and Light Extinction Model Performance Metrics, Goals,  
8 and Criteria for Three-Dimensional Air Quality Models. *Atmospheric Environment* **2006**,  
9 *40* (26), 4946–4959. <https://doi.org/10.1016/j.atmosenv.2005.09.087>.
- 10 (46) Morris, R. E.; McNally, D. E.; Tesche, T. W.; Tonnesen, G.; Boylan, J. W.; Brewer, P.  
11 Preliminary Evaluation of the Community Multiscale Air Quality Model for 2002 over the  
12 Southeastern United States. *Journal of the Air & Waste Management Association* **2005**, *55*  
13 (11), 1694–1708. <https://doi.org/10.1080/10473289.2005.10464765>.
- 14 (47) Tessum, C. W.; Hill, J. D.; Marshall, J. D. InMAP: A Model for Air Pollution Interventions.  
15 *PLoS ONE* **2017**, *12* (4), e0176131. <https://doi.org/10.1371/journal.pone.0176131>.
- 16 (48) Heo, J.; Adams, P. J.; Gao, H. O. Reduced-Form Modeling of Public Health Impacts of  
17 Inorganic PM<sub>2.5</sub> and Precursor Emissions. *Atmospheric Environment* **2016**, *137*, 80–89.  
18 <https://doi.org/10.1016/j.atmosenv.2016.04.026>.
- 19 (49) Muller, N. Z.; Mendelsohn, R.; Nordhaus, W. Environmental Accounting for Pollution in  
20 the United States Economy. *The American Economic Review* **2011**, *101* (5), 1649–1675.
- 21 (50) Krewski, D.; Jerrett, M.; Burnett, R. T.; Ma, R.; Hughes, E.; Shi, Y.; Turner, M. C.; Pope,  
22 C. A.; Thurston, G.; Calle, E. E.; Thun, M. J.; Beckerman, B.; DeLuca, P.; Finkelstein, N.;  
23 Ito, K.; Moore, D. K.; Newbold, K. B.; Ramsay, T.; Ross, Z.; Shin, H.; Tempalski, B.  
24 Extended Follow-up and Spatial Analysis of the American Cancer Society Study Linking  
25 Particulate Air Pollution and Mortality. *Res Rep Health Eff Inst* **2009**, No. 140, 5–114;  
26 discussion 115-136.
- 27 (51) Di, Q.; Wang, Y.; Zanobetti, A.; Wang, Y.; Koutrakis, P.; Choirat, C.; Dominici, F.;  
28 Schwartz, J. D. Air Pollution and Mortality in the Medicare Population. *N Engl J Med*  
29 **2017**, *376* (26), 2513–2522. <https://doi.org/10.1056/NEJMoa1702747>.
- 30 (52) CDC. *National Center for Health Statistics Mortality Data on CDC WONDER*. CDC  
31 WONDER. <https://wonder.cdc.gov/mcd.html> (accessed 2023-10-12).
- 32 (53) CDC. *Bridged-Race Population Estimates*. CDC WONDER.  
33 <https://wonder.cdc.gov/bridged-race-population.html> (accessed 2023-10-12).
- 34
